# Supplementary material for: A pilot study of a pharmacist-led prescribing program for final-year medical students
Source: PubMed Central journal article supplement (PMC6373005; doi:10.1186/s12909-019-1486-1), 2019-02-12
Supplement: 12909_2019_1486_MOESM2_ESM.pdf [file 12909_2019_1486_MOESM2_ESM.pdf]

**Baseline confidence ratings for generic prescribing skills for Rotation 5 and Rotation 6 students**

|                                                   | <b>Percentage rating as ‘not confident’ or ‘satisfactory but lacking confidence’<br/>(n)</b> |                             |
|---------------------------------------------------|----------------------------------------------------------------------------------------------|-----------------------------|
|                                                   | <b>Rotation 5<br/>(N=9)</b>                                                                  | <b>Rotation 6<br/>(N=7)</b> |
| Selecting appropriate medications for a condition | 78% (7)                                                                                      | 100% (7)                    |
| Writing an inpatient prescription                 | 67% (6)                                                                                      | 86% (6)                     |
| Writing an outpatient prescription                | 89% (8)                                                                                      | 100% (7)                    |
| Taking a medication history                       | 22% (2)                                                                                      | 29% (2)                     |
| Identifying potential drug interactions           | 89% (8)                                                                                      | 100% (7)                    |
| Identifying potential adverse drug reactions      | 78% (7)                                                                                      | 86% (6)                     |
| Monitoring the effectiveness of a medication      | 89% (8)                                                                                      | 71% (5)                     |
| Planning discharge medications                    | 78% (7)                                                                                      | 100% (7)                    |
